# Supplementary material for: Prevention of active-site destruction during the synthesis of high performance non-Pt cathode catalyst for fuel cells
Source: Royal Society of Chemistry journal article supplement (doi:10.1039/c6ra26454a), 2017-01-01
Supplement: c6ra26454a1.pdf [file c6ra26454a1.pdf]

## Supporting Information

### Prevention of active-site destruction during the synthesis of high performance non-Pt cathode catalyst for fuel cells

Rui Li<sup>a</sup>, Yu Jun Ge<sup>b</sup>, Fan He<sup>b</sup>, Li Ting Dou<sup>b</sup>, Bin Hong Liu<sup>c</sup>, Zhou Peng Li<sup>b\*</sup>

<sup>a</sup>Chu Kochen Honors College, Zhejiang University, Hangzhou, China

<sup>b</sup>College of Chemical & Biological Engineering, Zhejiang University, Hangzhou, China

<sup>c</sup>College of Materials Science & Engineering, Zhejiang University, Hangzhou, China

The N<sub>2</sub> adsorption–desorption isotherms of the Co/N-MPC(650/900) and Co/N-MPC(900/900) at 77 K were measured by an Autosorb-1-C automatic surface area analyzer (Quatachrome Corp.) to determine specific surface area. The samples were degassed to 10<sup>-6</sup> Pa for 2 h at 200 °C before they were tested. Specific surface area and pore size distribution were calculated on the basis of Brunnauer–Emmett–Teller (BET) and Barrett–Joyner–Halenda (BJH) methods, respectively.

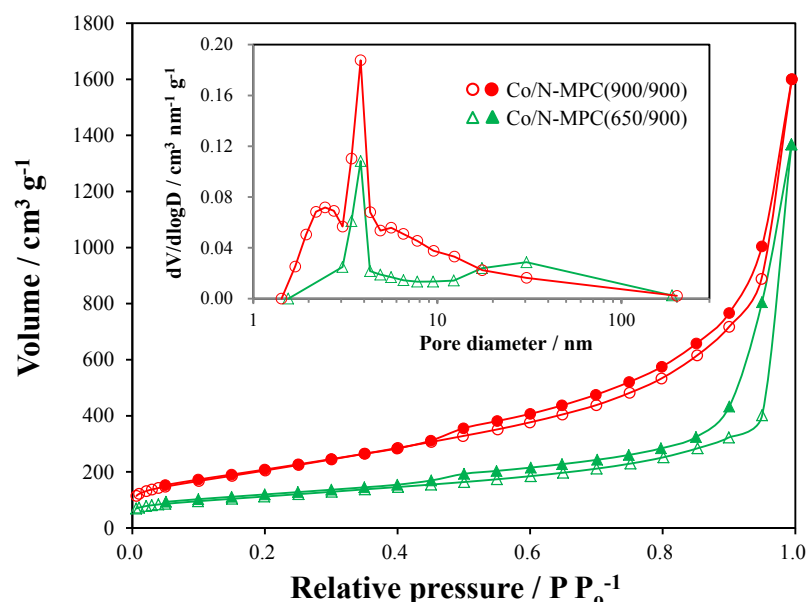

**Fig. S1.** N<sub>2</sub> absorption-desorption isotherms of the Co/N-MPC(650/900) and Co/N-MPC(900/900). Insert presents their pore size distributions.

**Tab. S1.** Specific surface area and pore characterization of Co/N-MPC(650/900) and Co/N-MPC(900/900).

|                   | Specific surface area<br>$S_{\text{BET}} / \text{m}^2 \text{g}^{-1}$ | Total pore volume<br>$V_{\text{total}} / \text{cm}^3 \text{g}^{-1}$ | Average pore diameter<br>$D_{\text{avg}} / \text{nm}$ |
|-------------------|----------------------------------------------------------------------|---------------------------------------------------------------------|-------------------------------------------------------|
| Co/N-MPC(650/900) | 322.8                                                                | 0.50                                                                | 21.2                                                  |
| Co/N-MPC(900/900) | 561.3                                                                | 0.99                                                                | 12.8                                                  |

\*Corresponding author: Z.P. Li, Tel: +86-571-87953149; Fax: +86-571-87953149;

E-mail address: [zhoupengli@zju.edu.cn](mailto:zhoupengli@zju.edu.cn) (Zhou Peng Li).
